# Supplementary material
Source: Springer Nature journal article supplement (https://mijn.bsl.nl/resource/supplementary/13047_2012_492_MOESM2_ESM.pdf/7473936)

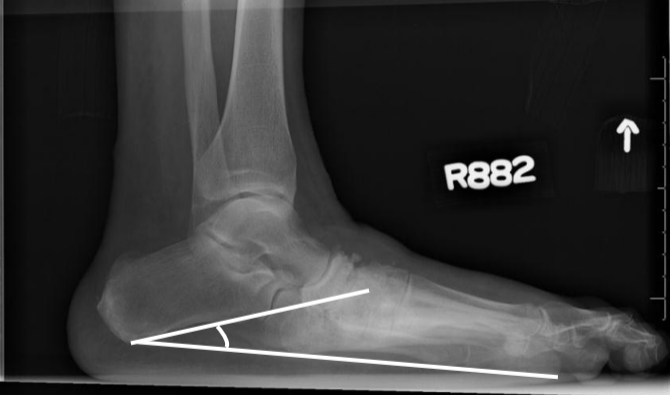

R882

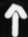

# Calcaneal Inclination Angle

Supplement: MOESM2 [file 7473936]
